# Supplementary material for: DNA Stable-Isotope Probing Delineates Carbon Flows from Rice Residues into Soil Microbial Communities Depending on Fertilization
Source: PubMed Central journal article supplement (PMC7082572; doi:10.1128/aem.02151-19), 2020-03-18
Supplement: AEM.02151-19-s0001.pdf [file AEM.02151-19-s0001.pdf]

1 **Supplementary for:**

2 **DNA stable-isotope probing delineates carbon flows from rice residues into soil**  
3 **microbial communities depending on fertilization**

4

5 Yali Kong <sup>a</sup>, Yakov Kuzyakov <sup>b,c</sup>, Yang Ruan <sup>a</sup>, Junwei Zhang <sup>a</sup>, Tingting Wang <sup>a</sup>, Min  
6 Wang <sup>a</sup>, Shiwei Guo <sup>a</sup>, Qirong Shen <sup>a</sup>, Ning Ling <sup>a\*</sup>

7

8 *a, Jiangsu Provincial Key Lab for Organic Solid Waste Utilization, Jiangsu Collaborative*  
9 *Innovation Center for Solid Organic Waste Resource Utilization, Nanjing Agricultural*  
10 *University, Nanjing, 210095, China.*

11 *b, Department of Soil Science of Temperate Ecosystems, Department of Agricultural Soil*  
12 *Science, University of Goettingen, Göttingen, Germany*

13 *c, Agro-Technology Institute, RUDN University, Moscow, Russia*

14

15

16 **\*Corresponding author: Ning Ling**

17 *E-mail address: nling@njau.edu.cn; Tel. (+86) 25 84396853.*

18

19

20

21 **List of supplemental Tables**

22 **Table S1** Impact of various factors on the <sup>13</sup>C-labeled bacterial and fungal community  
23 across all samples.

24 **Table S2** Topological properties of molecular ecology networks obtained for soils under  
25 different fertilization regimes.

26 NPK indicates soils with mineral-only fertilizers and NPKM indicates soil with mineral  
27 fertilizers combined with manure.

28 **Table S3** Nodes identified as module hubs or connectors in the microbial networks  
29 involved in the flow of rice-residue-derived C in soils under different fertilization  
30 regimes.

31 NPK indicates soils with mineral-only fertilizers and NPKM indicates soil with mineral  
32 fertilizers combined with manure.

33 **Table S4** Basic information of the bacterial and fungal operational taxonomic units  
34 (OTU) tables obtained in the heavy fraction after isopycnic gradient centrifugation.

35 NPK indicates soils with mineral-only fertilizers and NPKM indicates soil with mineral  
36 fertilizers combined with manure. The values 7D, 15D, 30D and 60D represent the  
37 sample time (day) after the addition of the rice residues. Data are means of three  
38 biological replicates.

39

40

41 **Table S1** Impact of various factors on the <sup>13</sup>C-labeled bacterial and fungal community  
42 across all samples

| Factor                 | Bacteria       |          |          | Fungi          |          |          |
|------------------------|----------------|----------|----------|----------------|----------|----------|
|                        | R <sup>2</sup> | <i>P</i> | <i>F</i> | R <sup>2</sup> | <i>P</i> | <i>F</i> |
| Treatments             | 0.52           | 0.001    | 159.9    | 0.29           | 0.001    | 290.4    |
| Sample time            | 0.29           | 0.001    | 29.3     | 0.31           | 0.001    | 102.4    |
| Treatments*Sample time | 0.14           | 0.001    | 13.9     | 0.38           | 0.001    | 124.7    |

43 Adonis analysis was applied using package “vegan” from R, with permutation = 999.

44 **Table S2** Topological properties of molecular ecology networks obtained for soils under  
45 different fertilization regimes.

| Fertilization regimes           | NPK   | NPKM   |
|---------------------------------|-------|--------|
| Number of nodes                 | 106   | 128    |
| Total number of edges           | 233   | 727    |
| Number of positive correlations | 100   | 363    |
| Number of negative correlations | 133   | 364    |
| Average path length             | 4.708 | 2.894  |
| Average clustering coefficient  | 0.375 | 0.498  |
| Modularity                      | 0.583 | 0.426  |
| Average degree                  | 4.396 | 11.359 |

46 NPK indicates soils with mineral-only fertilizers and NPKM indicates soil with mineral  
47 fertilizers combined with manure.

48

49 **Table S3** Nodes identified as module hubs or connectors in the microbial networks  
 50 involved in the flow of rice-residue-derived C in soils under different fertilization  
 51 regimes.

| OTUID       | Role        | Abundance |      | Phyla            | Affiliation                         |
|-------------|-------------|-----------|------|------------------|-------------------------------------|
|             |             |           | (%)  |                  |                                     |
| <b>NPK</b>  |             |           |      |                  |                                     |
| F-OTU30     | Module hubs |           | 2.3  | Ascomycota       | Jugulospora rotula                  |
| B-OTU140    | Connectors  |           | 0.26 | Unclassified     | Uncultured bacteria                 |
| <b>NPKM</b> |             |           |      |                  |                                     |
| F-OTU14     | Module hubs |           | 5.81 | Unclassified     | Uncultured fungus<br>Emericellopsis |
| F-OTU25     | Connectors  |           | 2.7  | Ascomycota       | terricola                           |
| F-OTU13     | Connectors  |           | 6.91 | Unclassified     | Uncultured fungus<br>Uncultured     |
| B-OTU1393   | Connectors  |           | 0.15 | Gemmatimonadetes | Gemmatimonadetes                    |

52 NPK indicates soils with mineral-only fertilizers and NPKM indicates soil with mineral  
 53 fertilizers combined with manure.  
 54

55 **Table S4** Basic information of the bacterial and fungal operational taxonomic unit (OTU) tables obtained in the heavy fraction after isopycnic  
 56 gradient centrifugation.

| Fertilization | Sample time | Residue                 | Number of reads         | Number of OTUs | Bacteria                          |                                        |                                  | Fungi           |                |                                   |                                        |                                  |     |
|---------------|-------------|-------------------------|-------------------------|----------------|-----------------------------------|----------------------------------------|----------------------------------|-----------------|----------------|-----------------------------------|----------------------------------------|----------------------------------|-----|
|               |             |                         |                         |                | Number of reads after rarefaction | Number of total OTUs after rarefaction | Number of OTUs after rarefaction | Number of reads | Number of OTUs | Number of reads after rarefaction | Number of total OTUs after rarefaction | Number of OTUs after rarefaction |     |
| NPK           | 7D          | <sup>12</sup> C-residue | 22781                   | 2758           | 18000                             | 5029                                   | 2571                             | 29992           | 437            | 20000                             | 1864                                   | 416                              |     |
|               |             | <sup>13</sup> C-residue | 20606                   | 1708           | 18000                             | 5029                                   | 1621                             | 27067           | 224            | 20000                             | 1864                                   | 204                              |     |
|               | 15D         | <sup>12</sup> C-residue | 22289                   | 3074           | 18000                             | 5029                                   | 2926                             | 27052           | 484            | 20000                             | 1864                                   | 466                              |     |
|               |             | <sup>13</sup> C-residue | 20221                   | 1886           | 18000                             | 5029                                   | 1801                             | 27417           | 275            | 20000                             | 1864                                   | 253                              |     |
|               | 30D         | <sup>12</sup> C-residue | 22969                   | 3031           | 18000                             | 5029                                   | 2864                             | 32056           | 592            | 20000                             | 1864                                   | 568                              |     |
|               |             | <sup>13</sup> C-residue | 19617                   | 1756           | 18000                             | 5029                                   | 1705                             | 29999           | 260            | 20000                             | 1864                                   | 231                              |     |
|               | 60D         | <sup>12</sup> C-residue | 22872                   | 3137           | 18000                             | 5029                                   | 3004                             | 31429           | 491            | 20000                             | 1864                                   | 464                              |     |
|               |             | <sup>13</sup> C-residue | 21298                   | 1978           | 18000                             | 5029                                   | 1869                             | 30311           | 244            | 20000                             | 1864                                   | 216                              |     |
|               | NPKM        | 7D                      | <sup>12</sup> C-residue | 20101          | 2931                              | 18000                                  | 5029                             | 2839            | 25462          | 376                               | 20000                                  | 1864                             | 363 |
|               |             |                         | <sup>13</sup> C-residue | 20182          | 1657                              | 18000                                  | 5029                             | 1605            | 30343          | 215                               | 20000                                  | 1864                             | 194 |
|               |             | 15D                     | <sup>12</sup> C-residue | 21208          | 3060                              | 18000                                  | 5029                             | 2936            | 27771          | 525                               | 20000                                  | 1864                             | 503 |
|               |             |                         | <sup>13</sup> C-residue | 20221          | 1876                              | 18000                                  | 5029                             | 1805            | 27153          | 331                               | 20000                                  | 1864                             | 301 |
| 30D           |             | <sup>12</sup> C-residue | 24681                   | 2301           | 18000                             | 5029                                   | 2113                             | 26255           | 371            | 20000                             | 1864                                   | 357                              |     |
|               |             | <sup>13</sup> C-residue | 22073                   | 1811           | 18000                             | 5029                                   | 1695                             | 28573           | 264            | 20000                             | 1864                                   | 246                              |     |
| 60D           |             | <sup>12</sup> C-residue | 21964                   | 3310           | 18000                             | 5029                                   | 3136                             | 29986           | 480            | 20000                             | 1864                                   | 461                              |     |
|               |             | <sup>13</sup> C-residue | 21518                   | 1995           | 18000                             | 5029                                   | 1881                             | 27577           | 265            | 20000                             | 1864                                   | 241                              |     |

57 NPK indicates soils with mineral-only fertilizers and NPKM indicates soil with mineral fertilizers combined with manure. The values 7D, 15D,  
 58 30D and 60D represent the sample time (day) after the addition of the rice residues. Data are means of three biological replicates.

59 **List of supplemental Figures**

60 **Fig. S1** Effects of rice residue addition on the efflux rate of CO<sub>2</sub> (a), the abundance of  
61 bacteria (b) and fungi (c), and the ratio of fungal to bacterial abundance (d) in soils  
62 under different fertilization regimes. The values 7D, 15D, 30D and 60D represent the  
63 sample time (day) after the addition of the rice residues. Data are means of three  
64 biological replicates. Different letters above the columns indicate significant  
65 differences between different treatments in each sampling point ( $P < 0.05$ ). NPK  
66 indicates soils with mineral-only fertilizers and NPKM indicates soil with mineral  
67 fertilizers combined with manure.

68 **Fig. S2** The relative abundance distribution of DNA from bacteria (a, b) and fungi (c,  
69 d) across the CsCl density gradient. Data are the means of three biological replicates  
70 that from day 17. NPK indicates soils with mineral-only fertilizers and NPKM indicates  
71 soil with mineral fertilizers combined with manure.

72

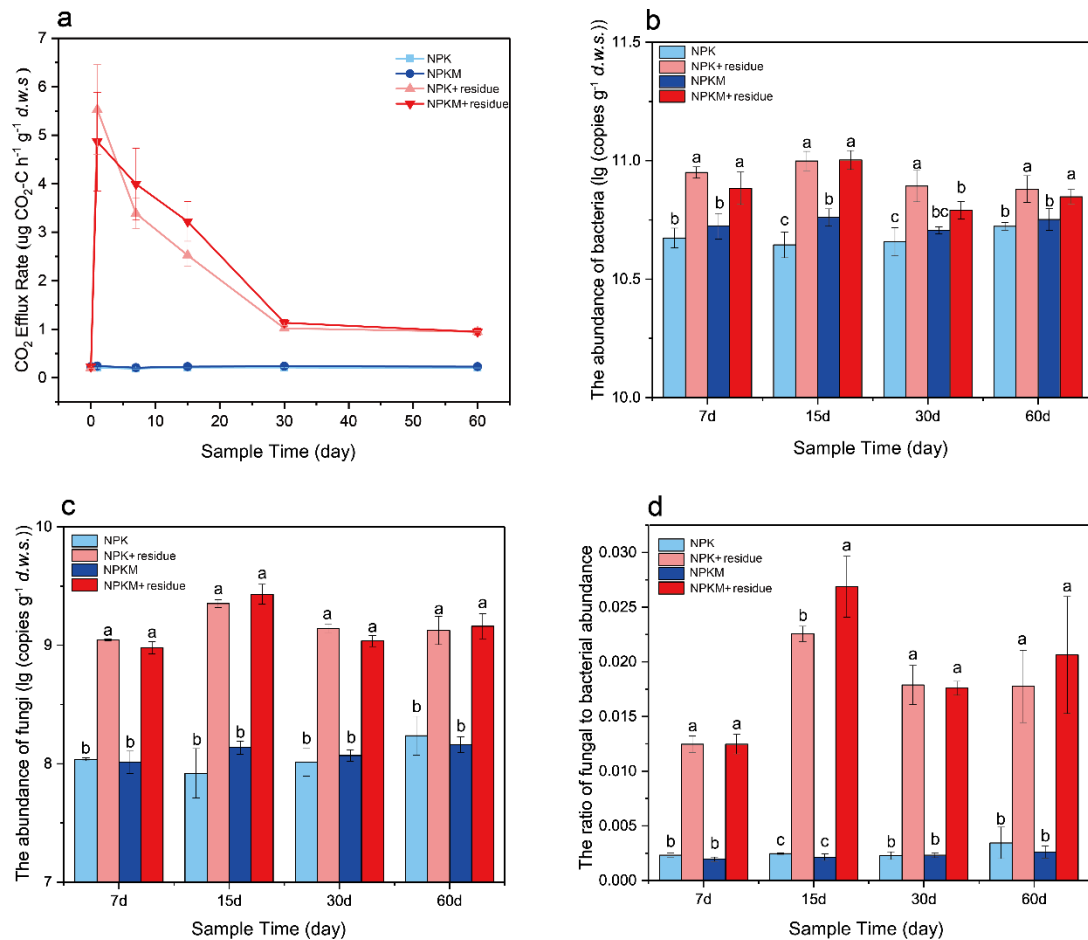

73 **Fig. S1** Effects of rice residue addition on the efflux rate of CO<sub>2</sub> (a), the abundance of  
 74 bacteria (b) and fungi (c), and the ratio of fungal to bacterial abundance (d) in soils  
 75 under different fertilization regimes. The values 7D, 15D, 30D and 60D represent the  
 76 sample time (day) after the addition of the rice residues. Data are means of three  
 77 biological replicates. Different letters above the columns indicate significant  
 78 differences between different treatments in each sampling point ( $P < 0.05$ ). NPK  
 79 indicates soils with mineral-only fertilizers and NPKM indicates soil with mineral  
 80 fertilizers combined with manure.

81

82



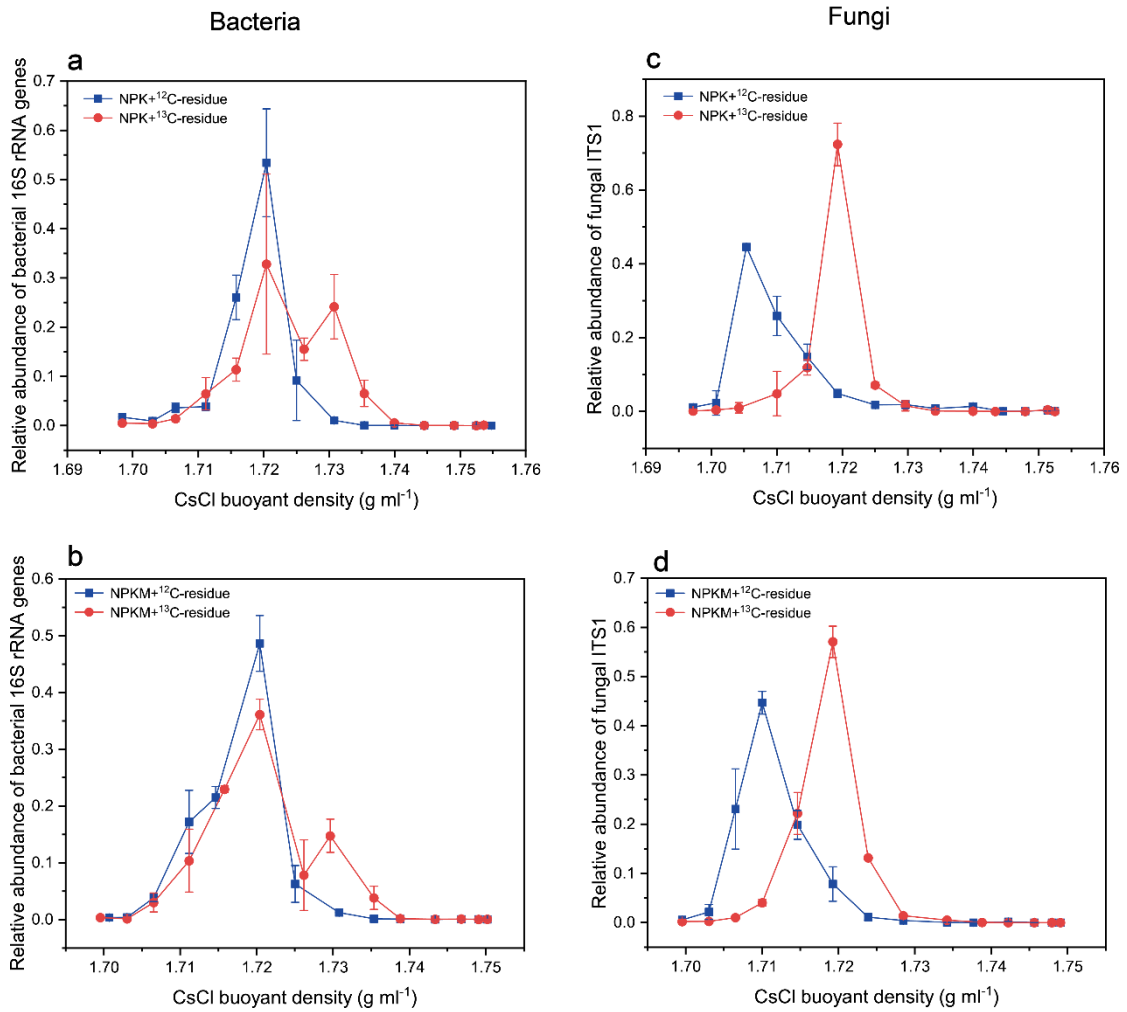

83

84 **Fig. S2** The relative abundance distribution of DNA from bacteria (a, b) and fungi (c,  
 85 d) across the CsCl density gradient. Data are the means of three biological replicates  
 86 that from day 17. NPK indicates soils with mineral-only fertilizers and NPKM indicates  
 87 soil with mineral fertilizers combined with manure.

88
